# Supplementary material
Source: MDPI journal article supplement (https://www.mdpi.com/2073-4395/12/5/1244)
Supplement: s1 [file s1]

Supplementary table

Table S1. Xylem functional and anatomical data of five blueberry cultivars

| Traits                                                                    | O'Neal        | Misty        | Tifblue      | Britewell     | Climax       | SHB                    | REB                   |
|---------------------------------------------------------------------------|---------------|--------------|--------------|---------------|--------------|------------------------|-----------------------|
| P <sub>50</sub> (MPa)                                                     | -1.70         | -1.52        | -1.46        | -1.41         | -1.36        | -1.61                  | -1.41                 |
| P <sub>12</sub> (MPa)                                                     | -0.34         | -0.58        | -0.07        | -0.10         | -0.43        | -0.46                  | -0.2                  |
| P <sub>88</sub> (MPa)                                                     | -3.08         | -2.45        | -2.85        | -2.73         | -2.30        | -2.77                  | -2.63                 |
| K <sub>H</sub> (kg m s <sup>-1</sup> MPa <sup>-1</sup> x10 <sup>6</sup> ) | 5.06±0.67     | 6.43±0.05    | 16.98±0.19   | 27.67±13.49   | 21.59±6.35   | <b>5.52±0.86**</b>     | <b>22.08±9.26**</b>   |
| K <sub>s</sub> (kg s <sup>-1</sup> MPa <sup>-1</sup> m <sup>-1</sup> )    | 0.57±0.05     | 0.87±0.01    | 1.86±0.24    | 1.85±0.38     | 1.32±0.19    | <b>0.67±0.16**</b>     | <b>1.67±0.37**</b>    |
| D <sub>v</sub> (µm)                                                       | 19.78±3.71    | 18.38±2.02   | 24.12±2.45   | 25.49±2.80    | 24.14±3.21   | <b>18.95±2.91**</b>    | <b>24.61±2.95**</b>   |
| VD (No. mm <sup>-2</sup> )                                                | 501.87±107.27 | 622.51±83.12 | 406.57±52.90 | 302.20±41.64  | 389.43±73.69 | <b>563.82±112.37**</b> | <b>365.60±72.76**</b> |
| CWR (×10 <sup>3</sup> )                                                   | 3.31          | 3.20         | 1.85         | 1.61          | 1.70         | <b>3.26±0.08**</b>     | <b>1.72±0.12**</b>    |
| WD (g cm <sup>-3</sup> )                                                  | 0.60±0.04     | 0.56±0.03    | 0.54±0.02    | 0.53±0.01     | 0.53±0.01    | <b>0.58±0.04**</b>     | <b>0.53±0.01**</b>    |
| VG                                                                        | 1.17±0.07     | 1.15±0.07    | 1.09±0.31    | 1.05±0.29     | 1.06±0.55    | <b>1.16±0.07**</b>     | <b>1.07±0.04**</b>    |
| PD (No. µm <sup>-2</sup> ×10 <sup>3</sup> )                               | 15.22±7.29    | 15.90±6.71   | 14.66±3.33   | 8.69±4.12     | 11.99±4.95   | <b>15.56±6.89**</b>    | <b>11.78±4.78**</b>   |
| A <sub>SP</sub> (µm <sup>2</sup> )                                        | 2.11±1.17     | 1.42±0.81    | 2.39±1.60    | 2.46±1.65     | 2.89±1.40    | <b>1.78±1.06**</b>     | <b>2.57±1.57**</b>    |
| A <sub>PA</sub> (mm <sup>2</sup> )                                        | 0.11          | 0.17         | 0.29         | 0.36          | 0.37         | <b>0.14±0.04*</b>      | <b>0.34±0.04*</b>     |
| T <sub>PM</sub> (nm)                                                      | 565.65±85.15  | 415.43±52.41 | 496.51±56.56 | 415.26±127.60 | 534.59±98.16 | 486.59±102.64          | 479.84±106.76         |

SHB data represent means of two southern highbush blueberry cultivars including O'Neal and Misty, and REB data represent means of three rabbiteye blueberry cultivars including Britewell, Climax and Tifblue. Values in bold represent a statistical significance between SHB and REB. \* indicates a statistical significance with  $P < 0.05$  between SHB and REB, and \*\* indicates a statistical significance with  $P < 0.01$  between SHB and REB.

$P_{50}$ ,  $P_{12}$  and  $P_{88}$ : Xylem water potential at 50, 12 and 88% loss of hydraulic conductivity;  $K_H$ : Branch hydraulic conductivity;  $K_S$ : Sapwood hydraulic conductivity;  $D_v$ : Vessel diameter;  $VD$ : Vessel density;  $CWR$ : Conduit wall reinforcement;  $WD$ : Wood density;  $VG$ : Vessel-grouping index;  $PD$ : Pit density;  $A_{SP}$ : Area of single pit aperture;  $A_{PA}$ : Total inner pit aperture surface area per vessel area;  $T_{PM}$ : Intervessel pit membrane thickness.
